# Supplementary material for: Rab25 suppresses colon cancer cell invasion through upregulating claudin‑7 expression
Source: PubMed Central journal article supplement — Oncol Rep. 2023 Dec 18;51(2):26. doi: 10.3892/or.2023.8685 (PMC10777460; doi:10.3892/or.2023.8685), 2023-12-18

Figure S1. Cell viability of Rab25- or vector-transfected cancer cells. The MTT assay was performed for cell viability analysis. Rab25, Ras-related protein 25; MTT, (3,4,5-dimethylthiazol-2yl)-5-diphenyl-tetrazolium bromide.

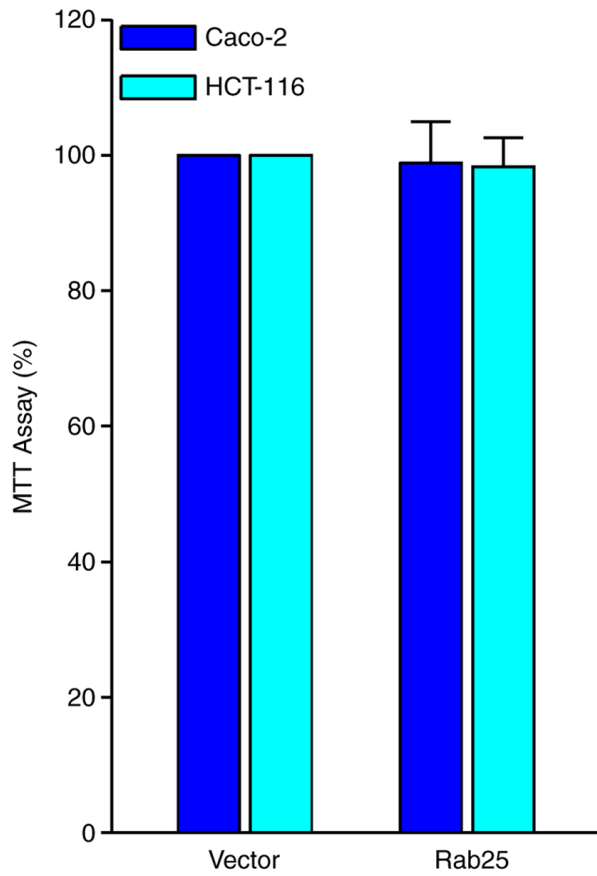

Figure S2. Ectopic expression of Rab25. The cell lysates were analyzed by immunoblotting with the indicated antibodies. Rab25, Ras-related protein 25.

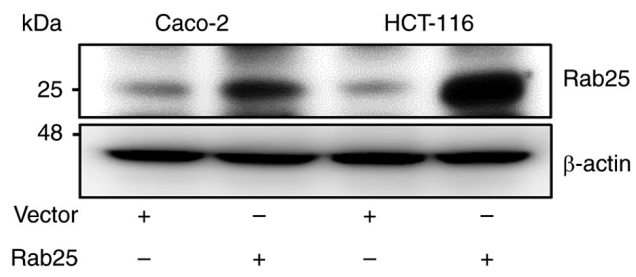

Figure S3. Rab25 suppresses colon cancer cell migration. Wound healing analysis for detecting cell migration. Original magnification x40; scale bar, 200  $\mu$ m. Rab25, Ras-related protein 25.

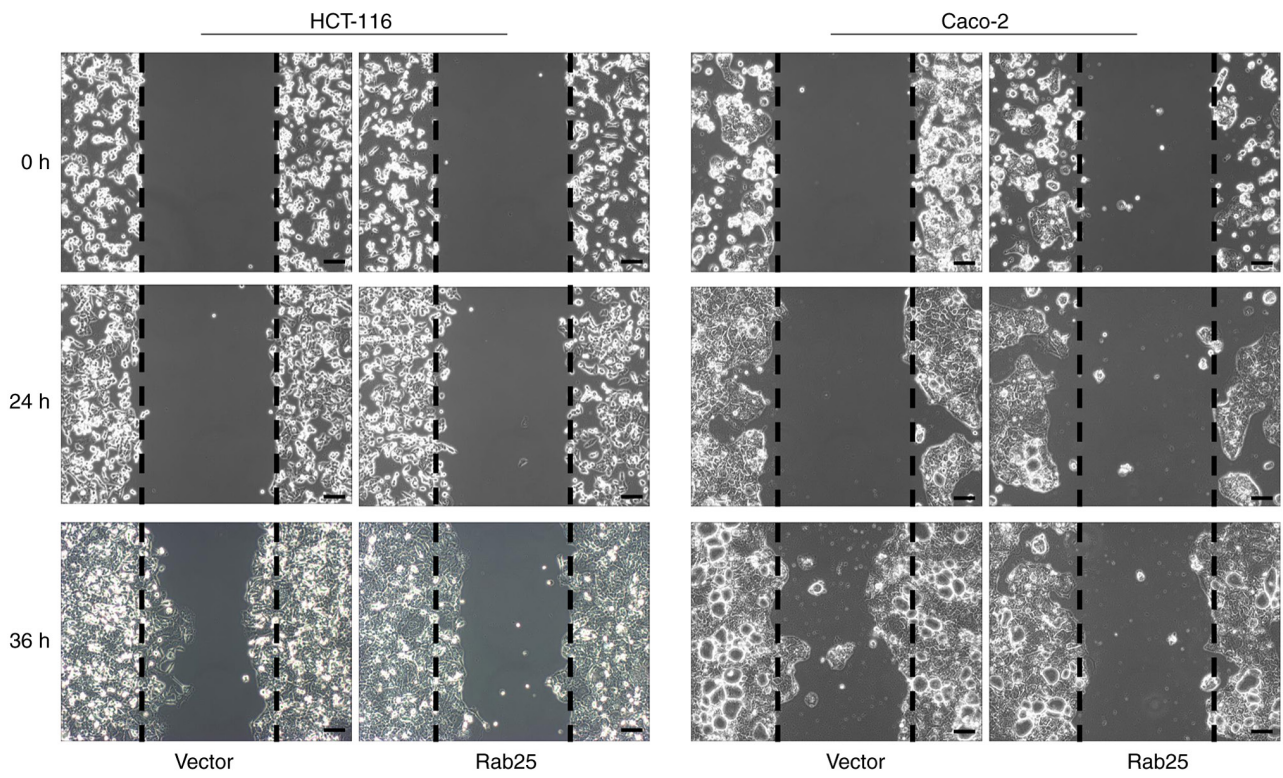

Figure S4. Silencing of Rab25 expression. The cell lysates were analyzed by immunoblotting with the indicated antibodies. Rab25, Ras-related protein 25; si, short interfering.

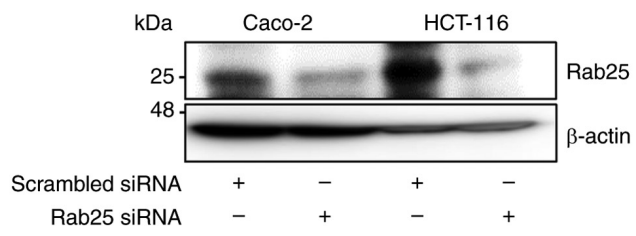

Figure S5. Silencing of Rab25 changes E-cadherin and Snail expression. The expression of E-cadherin and Snail was visualized using immunofluorescence. Original magnification, x400; scale bar, 20  $\mu\text{m}$ . Rab25, Ras-related protein 25; si, short interfering.

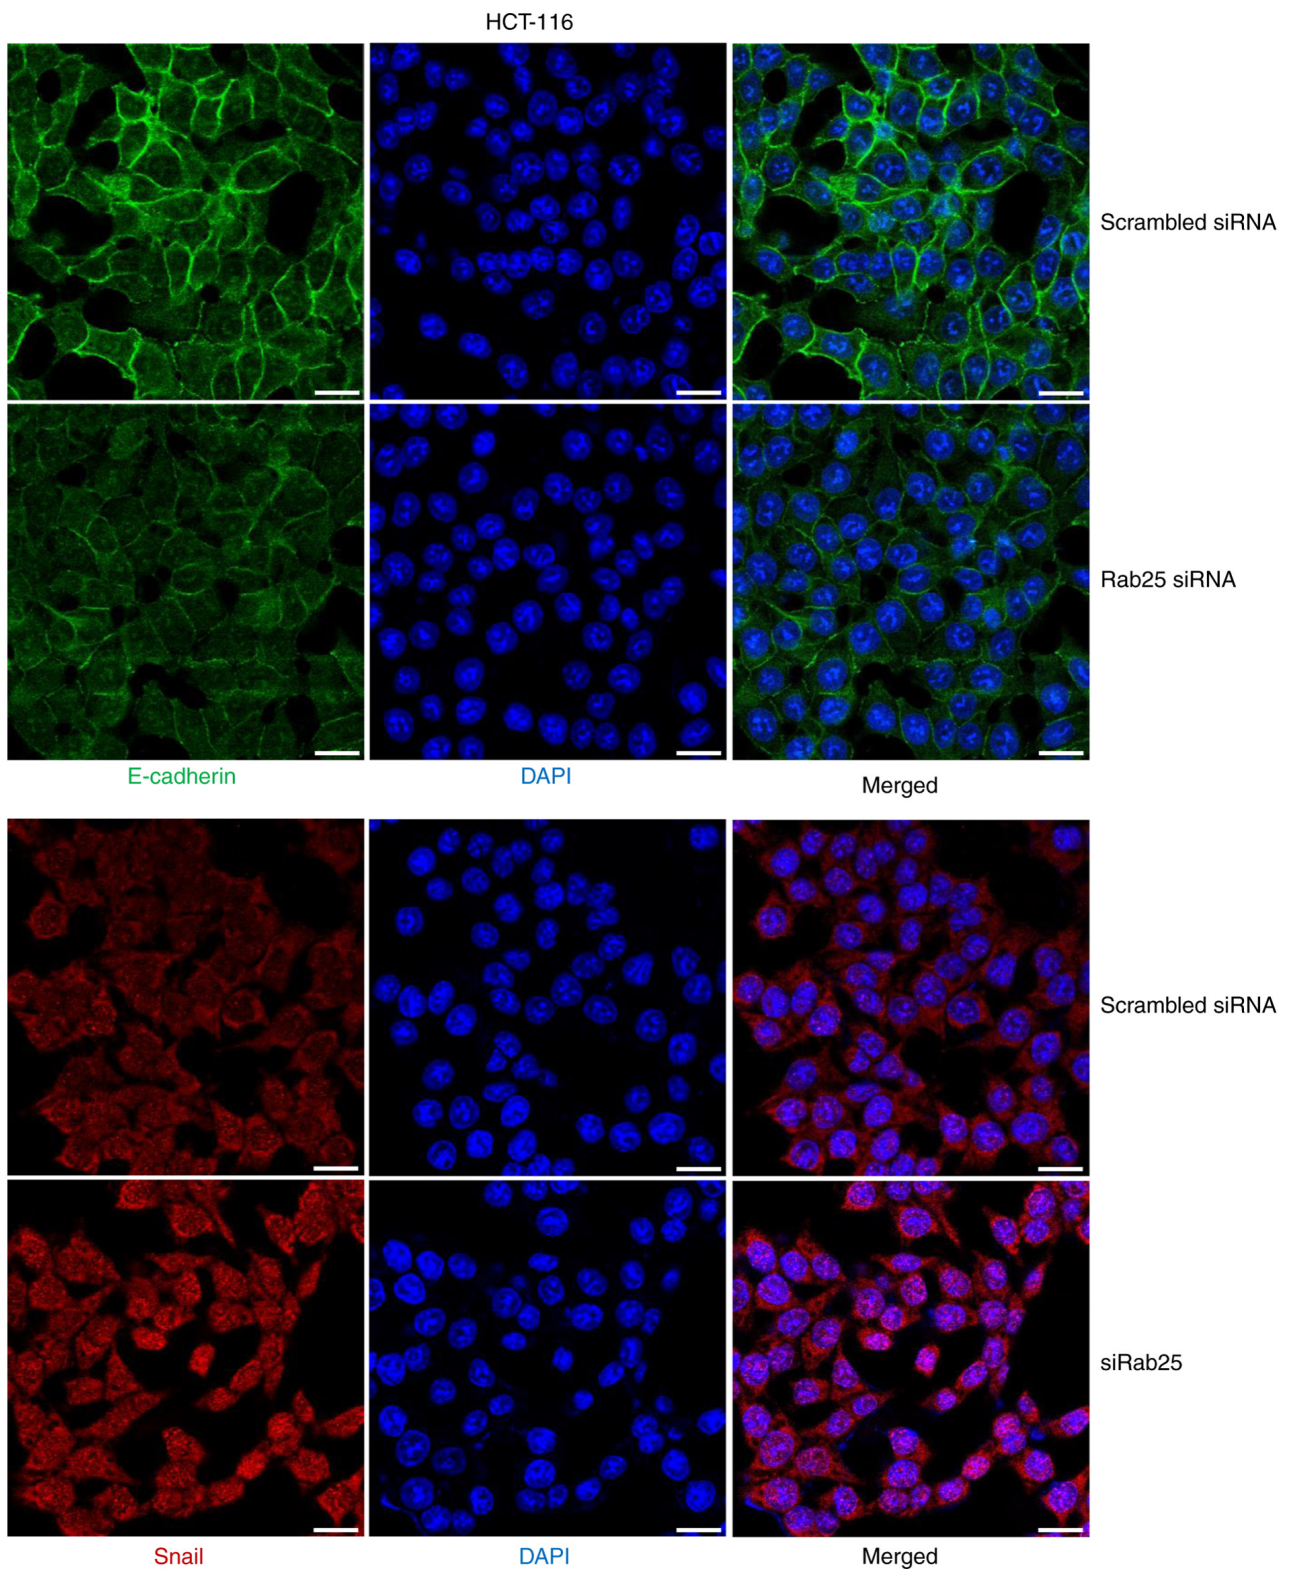



Figure S6. Claudin-7-induced E-cadherin expression. The E-cadherin expression was visualized using immunofluorescence. Original magnification, x400; scale bar, 20  $\mu$ m.

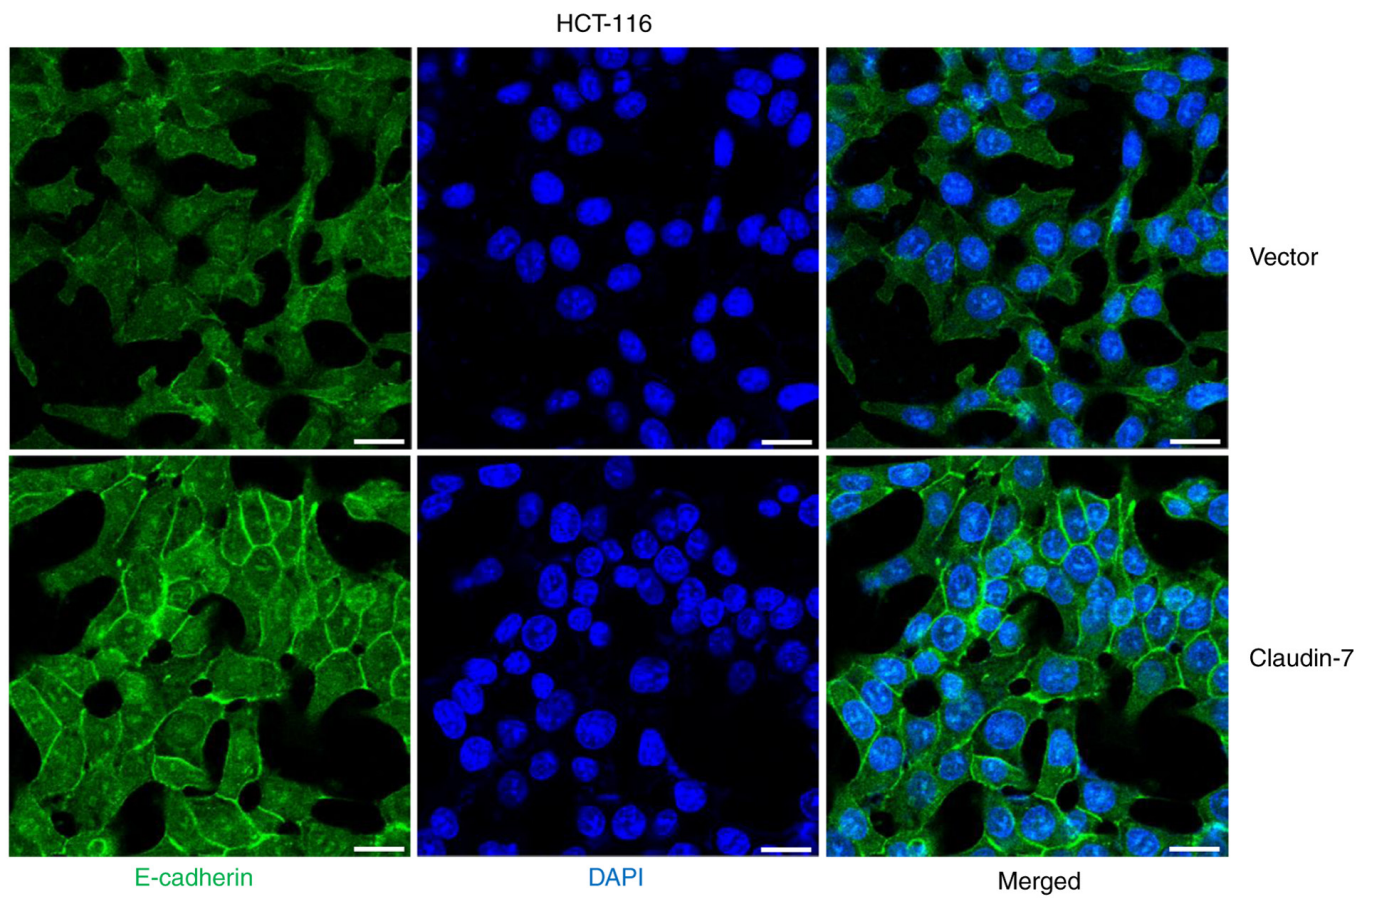

Supplement: Supplementary_Data.pdf [file Supplementary_Data.pdf]
